# Supplementary material for: UV/H2O2-Degraded Polysaccharides from Sargassum fusiforme: Purification, Structural Properties, and Anti-Inflammatory Activity
Source: MDPI journal article supplement (doi:10.3390/md21110561), 2023-10-26
Supplement: s1 [file s1]

Table S1 Primer sequences of genes

| Gene                           | Primer (5'-3')                   |
|--------------------------------|----------------------------------|
| <i>Trl4</i>                    | Forward: CAACATCATCCAGGAAGGC     |
|                                | Reverse: GAAGGCGATACAATTCCACC    |
| <i>Irak</i>                    | Forward: GTAGCCCAAAGGCATCAGGT    |
|                                | Reverse: CAAGTTCTTTGGCTGGCCCT    |
| <i>Il-1<math>\beta</math></i>  | Forward: GAAATGCCACCTTTTGACAGTG  |
|                                | Reverse: TGGATGCTCTCATCAGGACAG   |
| <i>Il-6</i>                    | Forward: CTGCAAGAGACTTCCATCCAG   |
|                                | Reverse: AGTGGTATAGACAGGTCTGTTGG |
| <i>Il-12</i>                   | Forward: CTGGAGCACTCCCCATTCCTA   |
|                                | Reverse: GCAGACATTCCCGCCTTTG     |
| <i>Tnf-<math>\alpha</math></i> | Forward: CAGGCGGTGCCTATGTCTC     |
|                                | Reverse: CGATCACCCCGAAGTTCAGTAG  |
| <i>Gapdh</i>                   | Forward: CTCGTCCCGTAGACAAAATGGT  |
|                                | Reverse: GAGGTCAATGAAGGGGTCGTT   |
